# Supplementary material for: Neural Mechanisms Underlying Affective Theory of Mind in Violent Antisocial Personality Disorder and/or Schizophrenia
Source: Oxford University Press journal article supplement (doi:10.1093/schbul/sbx012), 2017-01-30
Supplement: sbx012_suppl_schiffer_et_al_suppl_table_1.doc [file sbx012_suppl_schiffer_et_al_suppl_table_1.doc]

Supplementary Table 1. Pearson´s correlation coefficient between measures that distinguished SZ, VSZ-CD, and VSZ+CD men (N=47)

|  | IRI PD | IRI PT | PANSS EXC | PANSSDEP | PCL factor 1 | ToM Perf. (% correct) |
| --- | --- | --- | --- | --- | --- | --- |
| IRI PD | 1 |  |  |  |  |  |
| IRI PT | -.117 | 1 |  |  |  |  |
| PANSS EXC | -.371* | -.138 | 1 |  |  |  |
| PANSS DEP | -.094 | -.209 | .268 | 1 |  |  |
| PCL factor 1 score | -.239* | -.003 | .405** | .125 | 1 |  |
| ToM Perf. (%correct) | -.470** | .051 | .174 | -.144 | -.149 | 1 |
| Lingual/Fusiform gyrus | -.350* | -.293* | .318* | .259 | .149 | .286* |
| Medial PFC | -.285* | -.156 | .367* | .216 | .181 | .333* |
| l_pSTS/TPJ | -.275* | -.331* | .419** | .191 | .333** | .123 |
| l_ventrolateral PFC | -.351* | -.257 | .445** | .171 | .207 | -.024 |
| r_dorsolateral PFC | -.470** | -.310* | .364* | .208 | .311** | .387** |
| Precuneus | -.271* | -.397** | .311* | .337* | .201 | -.313* |
| l_superior temporal gyrus | -.395** | -.157 | .288* | .229 | .187 | .295* |
| l_suppl. motor area | -.256 | -.09 | .137 | .201 | .264* | .361* |
| l_amygdala | .293* | -.031 | -.264 | -.146 | -.609** | .157 |

Abbreviations: IRI PD or PT = Interpersonal Reactivity Index score Personal Distress or Perspective Taking; PANSS EXC or DEP = Positive and Negative Syndrome Scale score hostile excitement or depression; PCL = Psychopathy Checklist; PFC = prefrontal cortex; pSTS/TPJ = posterior superior temporal sulcus at temporoparietal junction.

* p<.05; ** p<.01
